# Supplementary material for: Gradient in the electric field for particle position detection in microfluidic channels
Source: Royal Society of Chemistry journal article supplement (doi:10.1039/c8lc01333k), 2019-01-01
Supplement: c8lc01333k1.pdf [file c8lc01333k1.pdf]

# Gradient in Electric Field for Particle Position Detection in Microfluidic Channels<sup>†</sup>

## Lab on a chip Supplementary Information

**Authors:** Miguel Solsona\*, Eiko Y. Westerbeek\*, Johan G. Bomer, Wouter Olthuis and Albert van den Berg

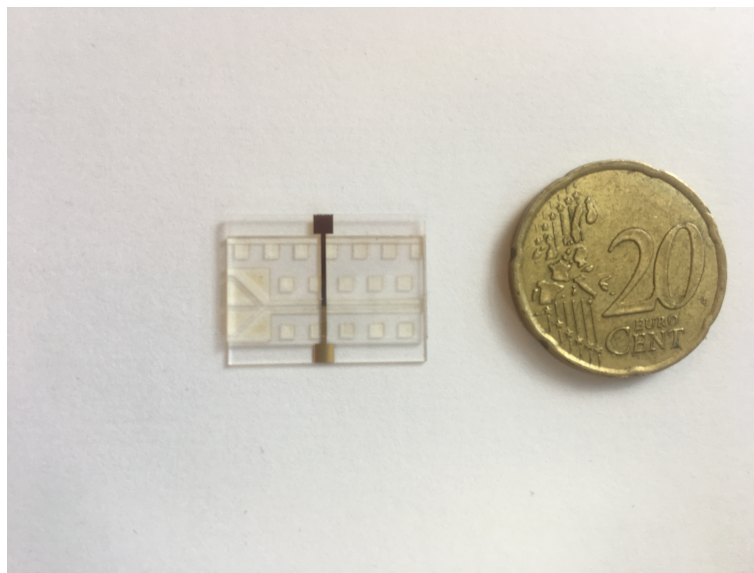

**Figure S1** . Microfluidic chip used to track the position of  $80\mu\text{m}$  particles.

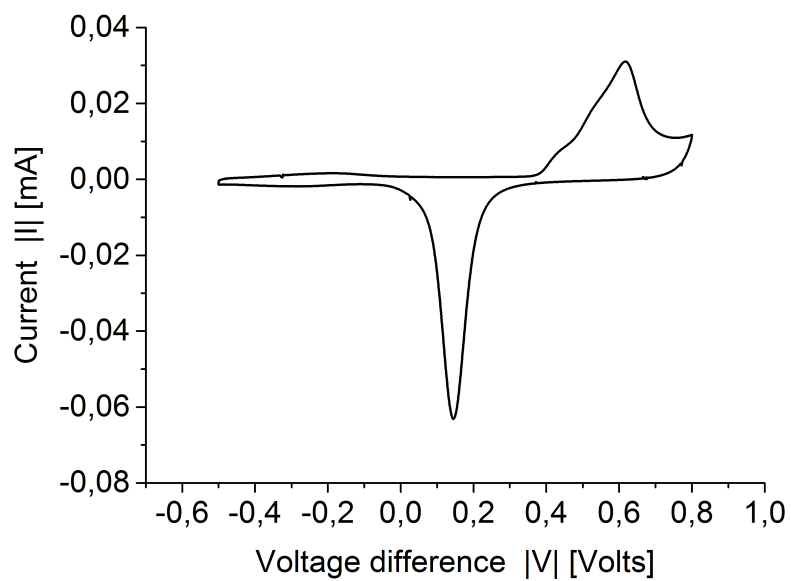

**Figure S2** . Cyclic voltammogram of the gold electrodes with exposed regions to be electrodesposited with platinum black in  $0.1\text{ M H}_2\text{SO}_4$  solution and a scan rate of  $10\text{ mV/s}$ .

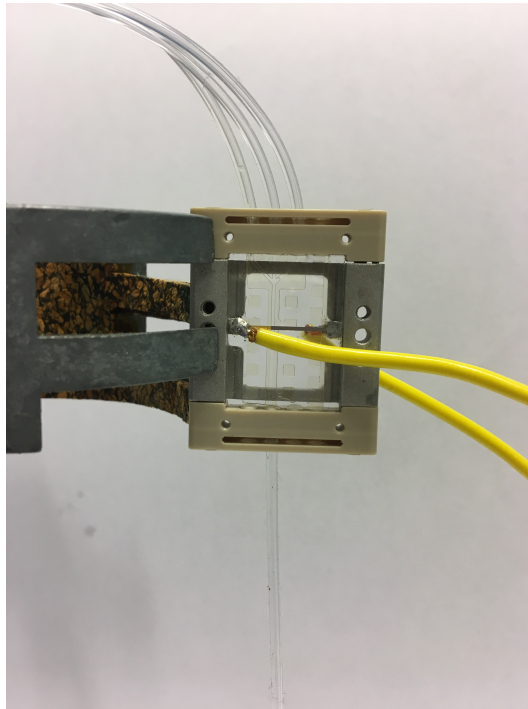

**Figure S3** . Microfluidic chip and chip-holder used to measure the position and conductivity of polystyrene particles.

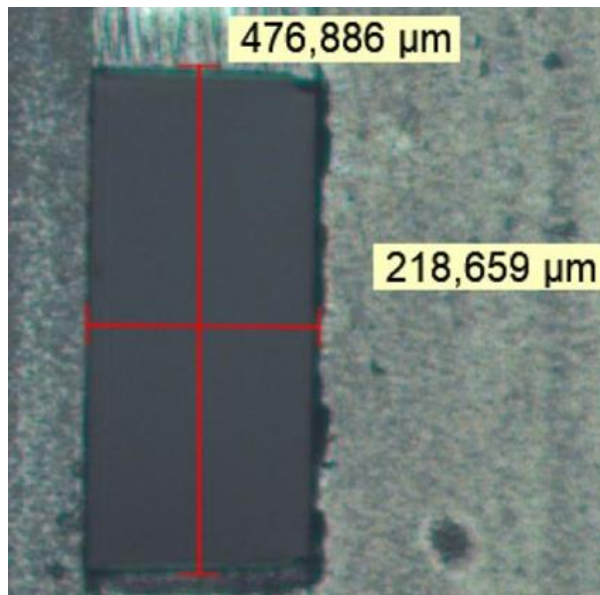

**Figure S4** . Dimensions of the microfluidic channel.

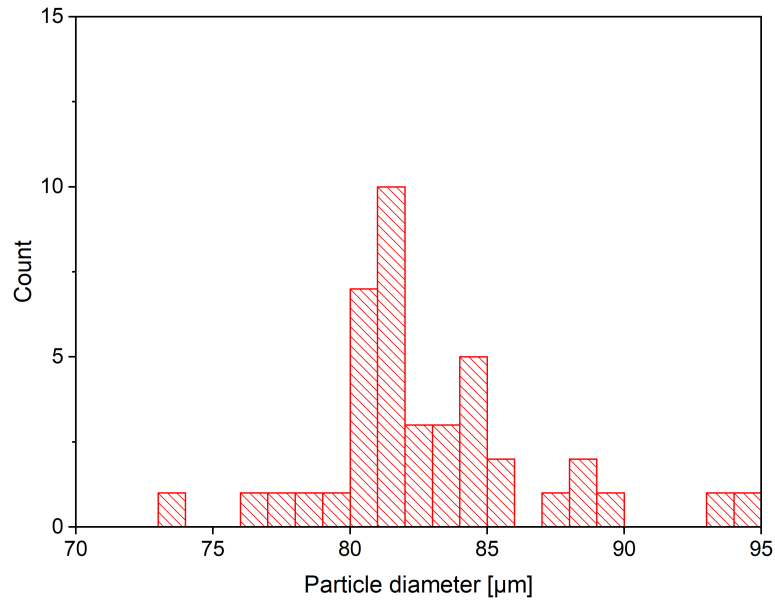

**Figure S5** . Histogram of the particle size distribution of 41 polystyrene particles.

$$\Delta Z = \frac{PeakHeight}{Total\ impedance\ of\ the\ system\ without\ particles} * 100 \quad (1)$$

**Table 1** Simulated impedance of polystyrene particles with different radius at high frequency.

| Radius (μm) | Frequency (ω) | Impedance (Ω) | Impedance difference with a 37 μm (Ω) |
|-------------|---------------|---------------|---------------------------------------|
| 37          | 100000        | 721,13        | 0,00                                  |
| 39          | 100000        | 721,75        | 0,61                                  |
| 41,5        | 100000        | 722,60        | 1,47                                  |
| 44          | 100000        | 723,56        | 2,43                                  |
| 47          | 100000        | 724,88        | 3,74                                  |

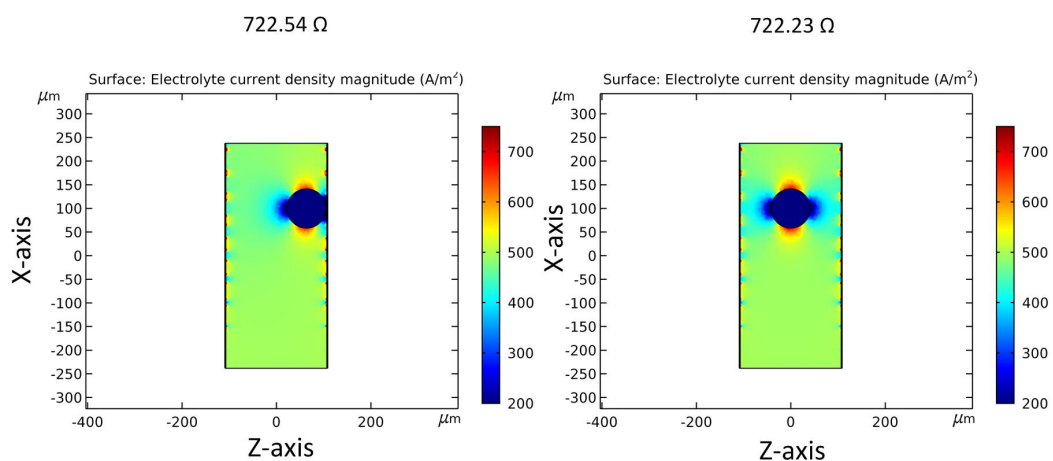

**Figure S6** . FEM simulations showing differences in impedance for different z-positions of the particle. X and y-axis are the spatial length in the electrochemical cells.

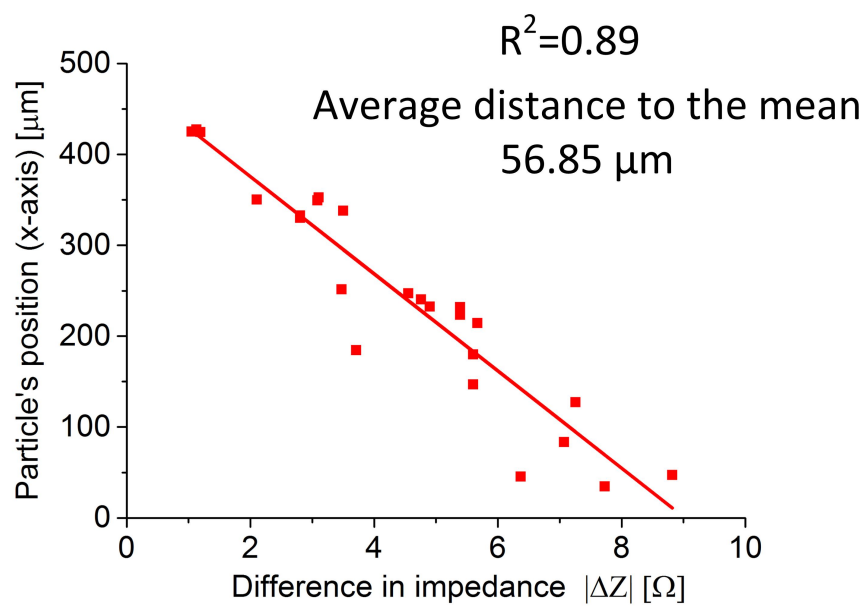

**Figure S7** . Linear trendline of the experimental data at 800Hz with  $R^2$  and average distance of the experimental data to the trendline.
